# Supplementary material
Source: PubMed Central journal article supplement (PMC6014917)
Supplement: NIHMS963393-supplement.pdf [file NIHMS963393-supplement.pdf]

## **Supplemental Information**

**Mitochondria export sulfur species required for cytosolic tRNA thiolation**

**Alok Pandey, Jayashree Pain, Nathaniel Dziuba, Ashutosh K. Pandey, Andrew Dancis,  
Paul A. Lindahl, and Debkumar Pain**

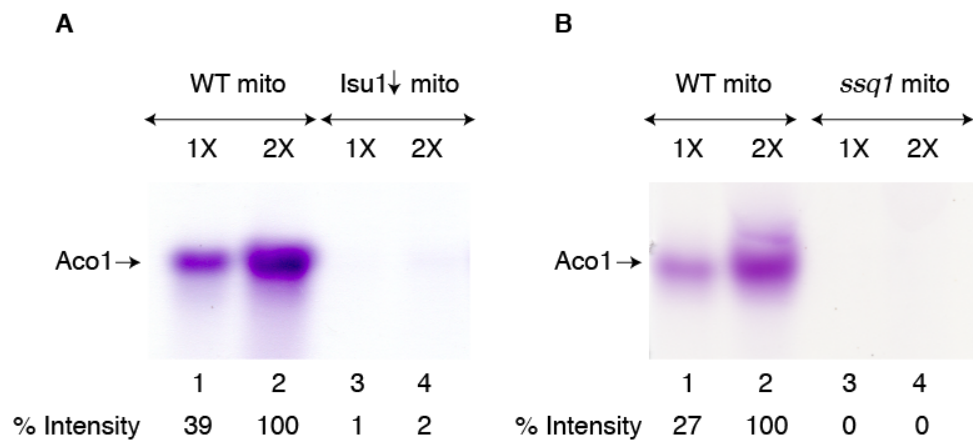

**Figure S1. Aconitase activity is undetectable in *Isu1*-depleted (*Isu1*↓; *Isu2* absent) or *ssq1* mutant mitochondria, Related to Figure 3.**

Aconitase activity was evaluated by an in-gel assay. 1X = 50 μg of mitochondrial proteins.

(A) Mitochondrial samples are identical to those in Figure 3B.

(B) Mitochondrial samples are identical to those in Figure 3C.

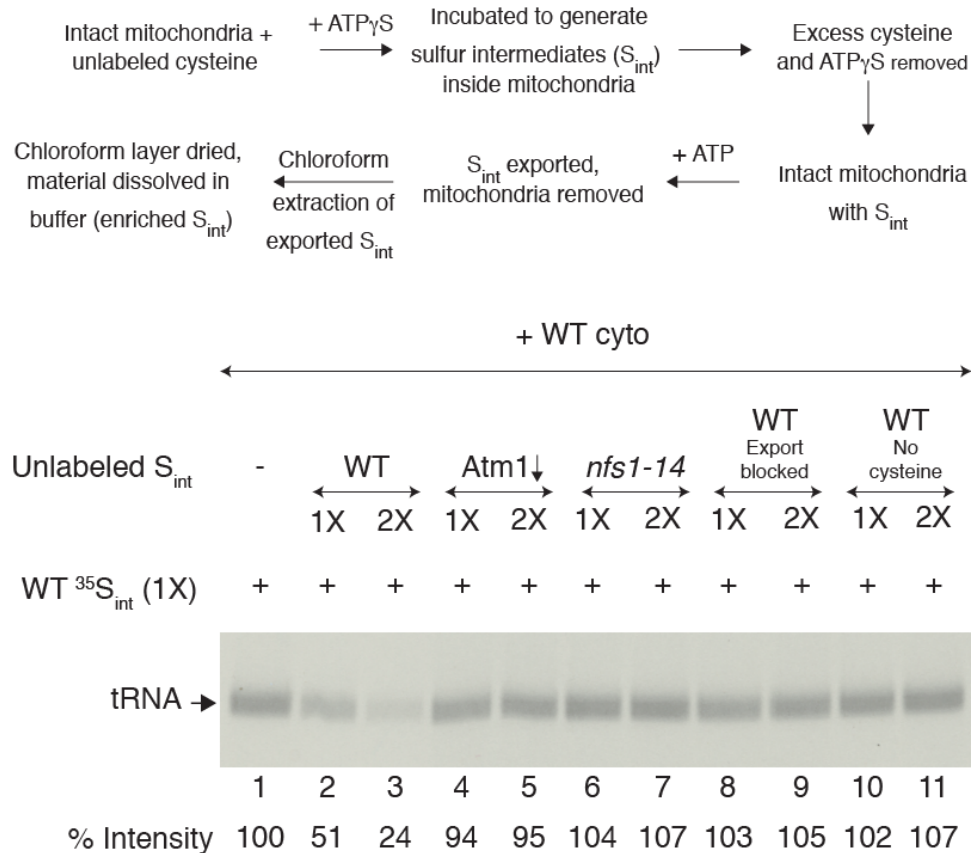

**Figure S2. Activity assessment of unlabeled materials exported from various mitochondria, Related to Figures 6, 7 and S3, and Table S2.**

(Top panel) A schematic outline for isolating materials exported from mitochondria is presented. Intact mitochondria (WT, *Atm1*↓, or *nfs1-14*) were incubated with unlabeled cysteine (10  $\mu$ M) and ATP $\gamma$ S (2 mM) (1<sup>st</sup> step). Mitochondria were recovered, washed and then incubated with ATP (4 mM ATP) (2<sup>nd</sup> step). After centrifugation, the supernatant fractions containing the exported material was extracted with chloroform. The organic layer was dried down, and the dried material was dissolved with 20 mM Hepes/KOH, pH 7.5. As a control, the export reaction with WT mitochondria during the 2<sup>nd</sup> step was performed in the presence of ATP $\gamma$ S rather than ATP (“Export blocked”). Likewise, exported material from WT mitochondria with no cysteine preloading during the 1<sup>st</sup> step served as another negative control (“No cysteine”). All of these unlabeled exported materials (called “Unlabeled S<sub>int</sub>”) were then tested in a competition assay as follows.

(Bottom panel) <sup>35</sup>S<sub>int</sub> exported from WT mitochondria (“WT <sup>35</sup>S<sub>int</sub>”) was obtained as described above except mitochondria were incubated with [<sup>35</sup>S]cysteine (10  $\mu$ Ci) instead of unlabeled cysteine during the 1<sup>st</sup> step. WT <sup>35</sup>S<sub>int</sub> was added to WT cytosol (200  $\mu$ g of proteins), and nucleotides were maintained at a final concentration of 4 mM ATP, 1 mM GTP, 2 mM NADH and 1 mM NADPH. Samples were incubated without (lane 1) or with unlabeled exported materials (“Unlabeled S<sub>int</sub>”; lanes 2-11) in HS buffer (20 mM Hepes/KOH, pH 7.5, 0.6 M sorbitol) at 30°C for 30 min. After TCA precipitation, samples were analyzed by 14% SDS-PAGE followed by autoradiography. 1X = 400  $\mu$ g of starting mitochondrial proteins.

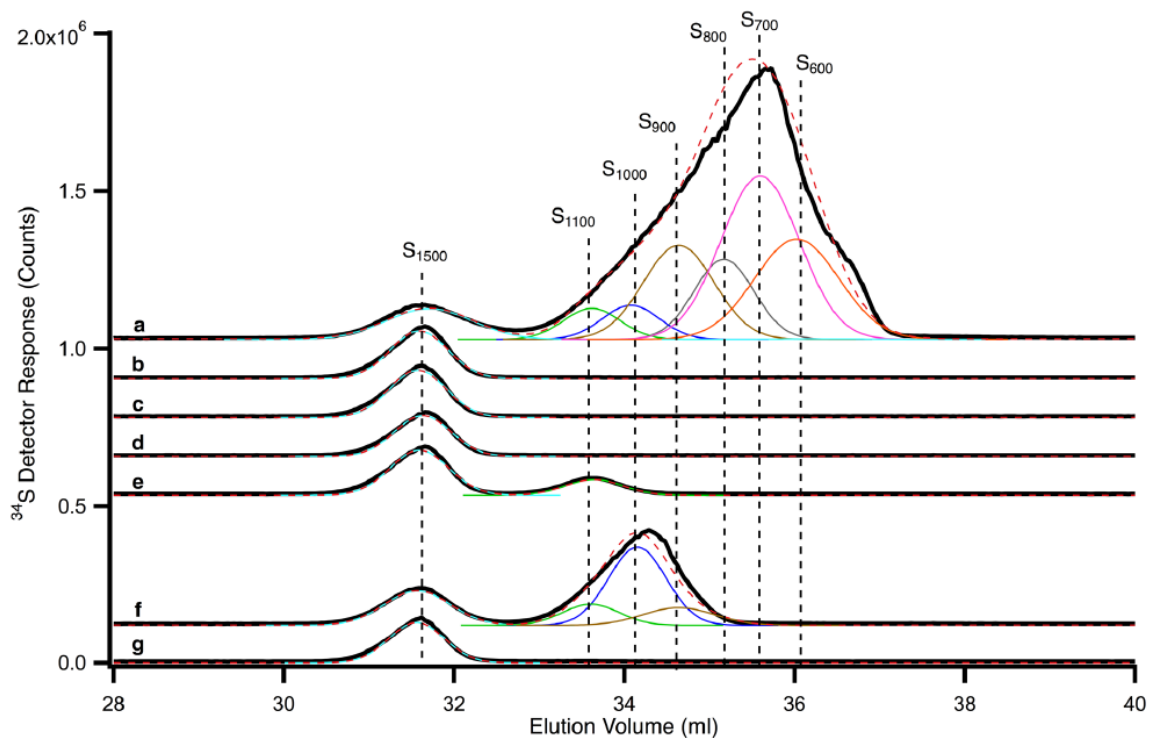

**Figure S3. SEC-ICP-MS chromatogram of sulfur species, Related to Figures 5, 7 and S2, and Table S2.**

Color-coding is the same as in Figure 7. Specifically, solid black lines are data, and dashed red lines are composite fits. Simulations of individual peaks are color-coded as follows: S<sub>1100</sub>, green; S<sub>1000</sub>, blue; S<sub>900</sub>, brown; S<sub>800</sub>, grey; S<sub>700</sub>, pink. Additional simulation for S<sub>600</sub> is indicated by orange color. Samples are: a) exported material from WT mitochondria (cysteine-preloaded), b) exported material from *nfs1-14* mitochondria (cysteine-preloaded), c) exported material from WT mitochondria with no cysteine preloading, d) exported material from WT mitochondria (cysteine-preloaded) in which ATP $\gamma$ S rather than ATP was used during the export process, e) exported material from *Atm1*-depleted (*Atm1* $\downarrow$ ) mitochondria (cysteine-preloaded), f) material isolated from WT mitochondrial matrix after preloading with cysteine, and g) material isolated from WT mitochondrial matrix with no cysteine preloading.

**Table S1. List of yeast strains used in this study, Related to STAR Methods.**

| <b>Strain number</b> | <b>Name</b>                              | <b>Genotype</b>                                                                                                                                    | <b>Source</b>         |
|----------------------|------------------------------------------|----------------------------------------------------------------------------------------------------------------------------------------------------|-----------------------|
| 66-16                | BY4741 (parental WT)                     | <i>MATa his3D1 leu2D0 met15D0 ura3D0</i>                                                                                                           | (Amutha et al., 2008) |
| 109-65               | $\Delta urm1$                            | <i>MATa his3D1 leu2D0 met15D0 ura3D0 <math>\Delta urm1::kanMX</math></i>                                                                           | Research Genetics     |
| 105-59               | <i>GALI-DRE2</i>                         | <i>MATa his3D1 leu2D0 met15D0 ura3D0 kanMX6-PGAL1-DRE2::DRE2</i>                                                                                   | This work             |
| 53-57                | YPH499 (parental WT)                     | <i>MATa ura3-52 lys2-801(amber) ade2-101(ochre) trp1-<math>\Delta</math>63 his3-<math>\Delta</math>200 leu2-<math>\Delta</math>1 cyh2</i>          | (Zhang et al., 2008)  |
| 68-8                 | <i>nfs1-14</i>                           | <i>MATa ura3-52 lys2-801(amber) ade2-101(ochre) trp1-<math>\Delta</math>63 his3-<math>\Delta</math>200 nfs1-14-LEU2 cyh2</i>                       | (Pandey et al., 2012) |
| 115-10               | <i>GALI-ISU1/<math>\Delta</math>isu2</i> | <i>MATa lys2-801(amber) ade2-101(ochre) trp1-<math>\Delta</math>63 leu2-<math>\Delta</math>1 pRS406-gamma nua2 (URA3) HIS3MX6-PGAL1-ISU1::ISU1</i> | (Yoon et al., 2015)   |
| 83-25                | <i>GALI-ATM1</i>                         | <i>MATa ura3-52 lys2-801(amber) ade2-101(ochre) trp1-<math>\Delta</math>63 leu2-<math>\Delta</math>1 cyh2 HIS3MX6-PGAL1-ATM1::ATM1</i>             | (Zhang et al., 2008)  |
| 102-61               | 61 (parental WT)                         | <i>MATalpha FRE1-HIS3::URA3 trp1-63 leu2-3,112 gcn4-101 his3-609 SSC2</i>                                                                          | (Knight et al., 1998) |
| 73-39                | 33C ( <i>ssq1</i> mutant)                | <i>MATa FRE1-HIS3::URA3 TRP1 leu2-3,112 gcn4-101 his3-609 ssc2-1</i>                                                                               | (Knight et al., 1998) |

**Table S2. Analysis of SEC-ICP-MS chromatographic traces, Related to Figures 5, 7, S2 and S3.**The most intense peak ( $S_{700}$  of Figure S3, trace *a*) was assigned a value of 100.

| Trace                                                                        | $S_{1500}$    | $S_{1100}$ | $S_{1000}$  | $S_{900}$   | $S_{800}$   | $S_{700}$   | $S_{600}$   |
|------------------------------------------------------------------------------|---------------|------------|-------------|-------------|-------------|-------------|-------------|
| Center position (ml)                                                         | 31.5          | 33.6       | 34.1        | 34.6        | 35.2        | 35.6        | 36.0        |
| Linewidth (ml)                                                               | $0.9 \pm 0.1$ | 0.78       | 0.79        | 0.98        | 0.83        | 1.1         | 1.2         |
| Relative Intensities                                                         |               |            |             |             |             |             |             |
| Figure 7, trace a                                                            | 24            | 17         | 11          | 44          | 25          | 69          | 0           |
| Replicate                                                                    | 24            | 16         | 9           | 45          | 10          | 83          | 0           |
| Replicate                                                                    | 23            | 17         | 10          | 44          | 20          | 70          | 0           |
| Figure S3, trace a                                                           | 21            | 14         | 16          | 51          | 37          | 100         | 66          |
| Exported from WT mito (Cys preloaded) (Av)                                   | $23 \pm 1$    | $16 \pm 1$ | $12 \pm 3$  | $46 \pm 3$  | $23 \pm 11$ | $80 \pm 14$ | $16 \pm 33$ |
| Figure 7, trace b                                                            |               |            |             |             |             |             |             |
| Replicate                                                                    | 17            | 0          | 0           | 0           | 0           | 0           | 0           |
| Replicate                                                                    | 19            | 0          | 0           | 0           | 0           | 0           | 0           |
| Figure S3, trace b                                                           | 21            | 0          | 0           | 0           | 0           | 0           | 0           |
| Exported from <i>nfs1-14</i> mito (Cys preloaded) (Av)                       | $19 \pm 2$    |            |             |             |             |             |             |
| Figure 7, trace c                                                            |               |            |             |             |             |             |             |
| Replicate                                                                    | 21            | 0          | 0           | 0           | 0           | 0           | 0           |
| Replicate                                                                    | 21            | 0          | 0           | 0           | 0           | 0           | 0           |
| Exported from WT mito with no Cys preloading (Av)                            | 21            |            |             |             |             |             |             |
| Figure 7, trace d                                                            |               |            |             |             |             |             |             |
| Replicate                                                                    | 20            | 0          | 0           | 0           | 0           | 0           | 0           |
| Replicate                                                                    | 17            | 0          | 0           | 0           | 0           | 0           | 0           |
| Figure S3, trace d                                                           | 17            | 0          | 0           | 0           | 0           | 0           | 0           |
| Exported from WT mito (Cys preloaded) in the presence of ATP $\gamma$ S (Av) | $18 \pm 2$    |            |             |             |             |             |             |
| Figure 7, trace e                                                            |               |            |             |             |             |             |             |
| Replicate                                                                    | 24            | 9          | 0           | 0           | 0           | 0           | 0           |
| Replicate                                                                    | 20            | 7          | 0           | 0           | 0           | 0           | 0           |
| Figure S3, trace e                                                           | 20            | 7          | 0           | 0           | 0           | 0           | 0           |
| Exported from <i>Atm1</i> $\downarrow$ mito (Cys preloaded) (Av)             | $21 \pm 2$    | $8 \pm 1$  |             |             |             |             |             |
| Figure 7, trace f                                                            |               |            |             |             |             |             |             |
| Replicate                                                                    | 19            | 13         | 11          | 44          | 25          | 0           | 0           |
| Replicate                                                                    | 16            | 13         | 4           | 59          | 0           | 0           | 0           |
| Figure S3, trace f                                                           | 17            | 10         | 35          | 10          | 0           | 0           | 0           |
| Isolated from WT mito matrix (Cys preloaded) (Av)                            | $17 \pm 2$    | $12 \pm 2$ | $17 \pm 16$ | $38 \pm 25$ | $8 \pm 14$  |             |             |
| Figure 7, trace g                                                            |               |            |             |             |             |             |             |
| Replicate                                                                    | 17            | 0          | 0           | 0           | 0           | 0           | 0           |
| Replicate                                                                    | 17            | 0          | 0           | 0           | 0           | 0           | 0           |
| Isolated from WT mito matrix with no Cys preloading (Av)                     | 17            |            |             |             |             |             |             |
| Figure 7, trace h Buffer control                                             |               |            |             |             |             |             |             |
| Replicate                                                                    | 29            | 0          | 0           | 0           | 0           | 0           | 0           |
